# Supplementary material
Source: PubMed Central journal article supplement (PMC3252912)
Supplement: 1111316109_pnas.1111316109_SI.pdf [file 1111316109_pnas.1111316109_SI.pdf]

# Supporting Information

Macdonald-Obermann et al. 10.1073/pnas.1111316109

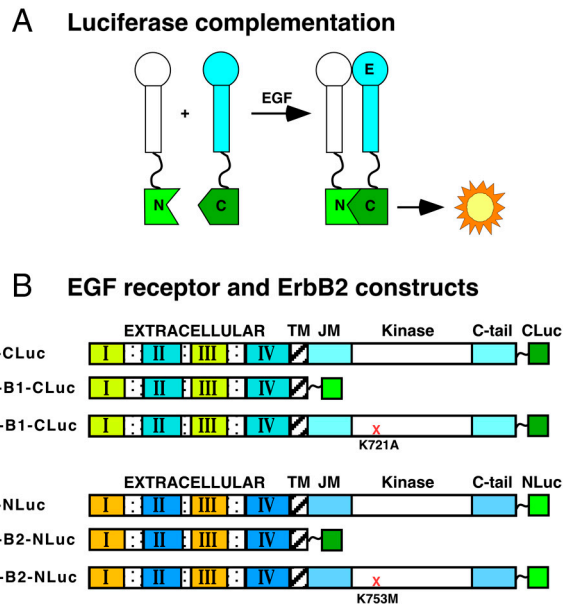

**Fig. S1.** Luciferase complementation and constructs used in these experiments. (A) Complementation of an EGF receptor (cyan) fused to the carboxy-terminal half of firefly luciferase and ErbB2 (white) fused to the amino-terminal half of firefly luciferase. When the fragments are separated in space, no complementation is possible. When the fragments are brought into close proximity, they interact to form active firefly luciferase, which uses luciferin to produce light. (B) The constructs used in these experiments. The domain structure of the EGF receptor and ErbB2 is outlined. TM, transmembrane segment; JM, intracellular juxta-membrane segment. The luciferase fragments are fused to the C terminus of the receptors following a flexible linker sequence. B1 refers to the EGF receptor. B2 refers to ErbB2. CLuc, C-terminal luciferase fragment; NLuc, N-terminal luciferase fragment; KD, kinase dead.
